# Supplementary material for: MicroRNA-124 mediates the cholinergic anti-inflammatory action through inhibiting the production of pro-inflammatory cytokines
Source: PubMed Central journal article supplement — Cell Res. 2013 Aug 27;23(11):1270–83. doi: 10.1038/cr.2013.116 (PMC3817544; doi:10.1038/cr.2013.116), 2013-08-27
Supplement: cr2013116x1.pdf [file cr2013116x1.pdf]

## Supplementary information, Figure S1

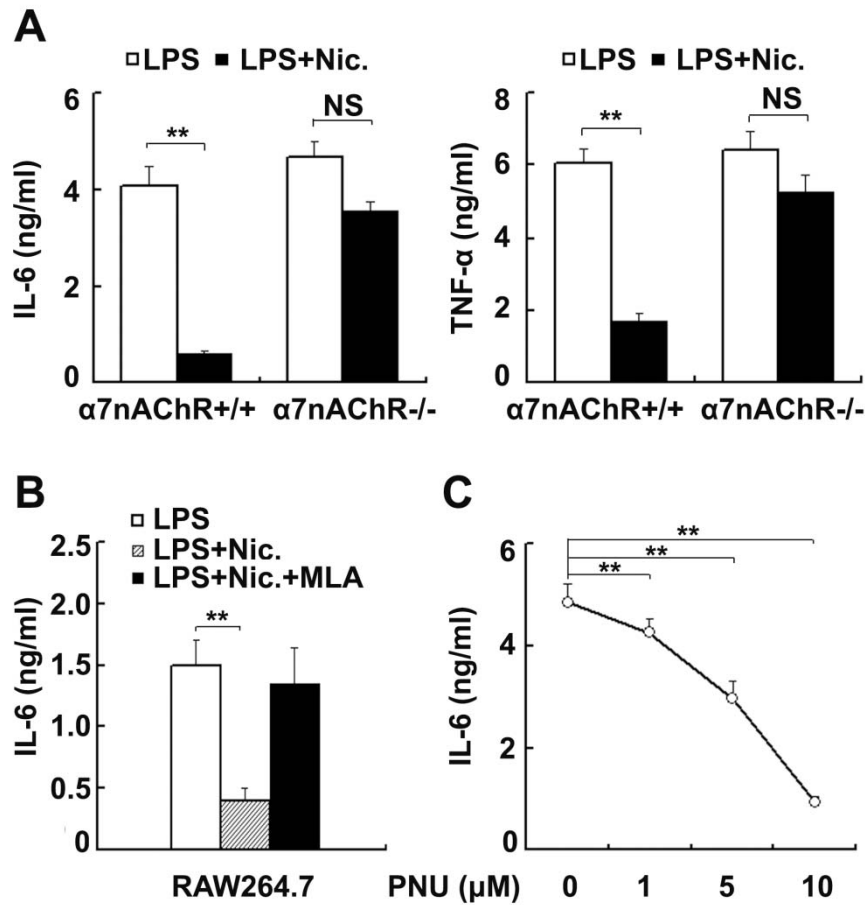

**Figure S1**  $\alpha 7nAChR$  is required for the inhibitory role of cholinergic agonists in cytokine production. **(A)** ELISA detection of IL-6 (left) and TNF- $\alpha$  (right) in the supernatant of peritoneal macrophages from  $\alpha 7nAChR^{+/+}$  or  $\alpha 7nAChR^{-/-}$  mice treated with 100 ng/ml LPS in the presence or absence of 5 mM nicotine for 9 h. **(B)** ELISA detection of IL-6 in the supernatant of RAW264.7 cells pre-incubated with vehicle, 5 mM nicotine, 5 mM nicotine in combination with 10  $\mu M$  MLA and then stimulated with 100 ng/ml LPS for 9 h. **(C)** ELISA detection of IL-6 in the supernatant of RAW264.7 cells incubated with the indicated doses of PNU for 10 min and then stimulated with 100 ng/ml LPS for 9 h. Data represent mean  $\pm$  S.D. ( $n = 3$ ). NS, not significant;  $**P < 0.01$  by Student's  $t$ -test.
