# Supplementary material for: MicroRNA-124 mediates the cholinergic anti-inflammatory action through inhibiting the production of pro-inflammatory cytokines
Source: PubMed Central journal article supplement — Cell Res. 2013 Aug 27;23(11):1270–83. doi: 10.1038/cr.2013.116 (PMC3817544; doi:10.1038/cr.2013.116), 2013-08-27
Supplement: cr2013116x2.pdf [file cr2013116x2.pdf]

## Supplementary information, Figure S2

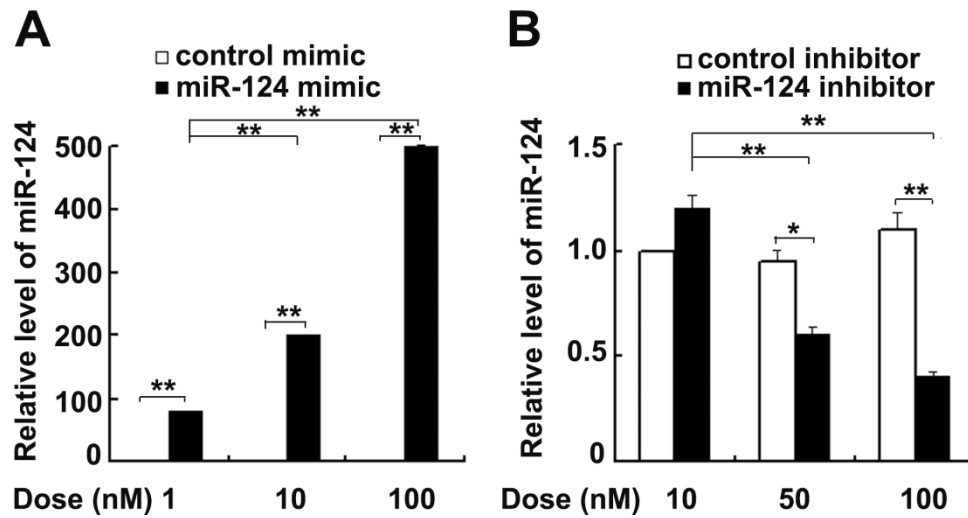

**Figure S2** Efficiency of miR-124 mimic or inhibitor transfection. **(A)** q-PCR detection of miR-124 in RAW264.7 cells transfected with the indicated doses of miR-124 mimic or negative control for 36 h. **(B)** q-PCR detection of miR-124 in RAW264.7 cells transfected with the indicated doses of miR-124 inhibitor or negative control for 36 h. Data represent mean  $\pm$  S.D. ( $n = 3$ ). \*\* $P < 0.01$  by Student's  $t$ -test.
