# Supplementary material for: MicroRNA-124 mediates the cholinergic anti-inflammatory action through inhibiting the production of pro-inflammatory cytokines
Source: PubMed Central journal article supplement — Cell Res. 2013 Aug 27;23(11):1270–83. doi: 10.1038/cr.2013.116 (PMC3817544; doi:10.1038/cr.2013.116), 2013-08-27
Supplement: cr2013116x3.pdf [file cr2013116x3.pdf]

## Supplementary information, Figure S3

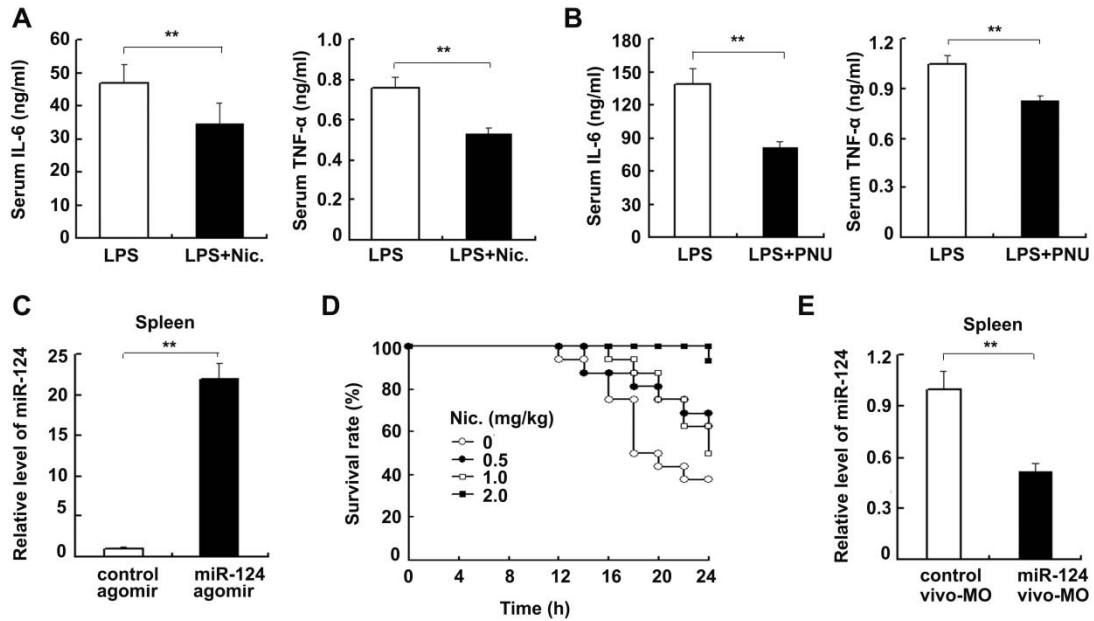

**Figure S3** Effect of cholinergic agonists on serum cytokine production and survival rate, and efficiency of miR-124 agomir or antisense transfection *in vivo*. **(A)** ELISA detection of serum IL-6 and TNF- $\alpha$  obtained from BALB/c mice i.p. given 30 mg/kg LPS together with control vehicle or 2 mg/kg nicotine for 3 h. Results are mean  $\pm$  S.D. ( $n = 6$ ). **(B)** ELISA detection of serum IL-6 and TNF- $\alpha$  obtained from BALB/c mice i.p. injected with 30 mg/kg LPS in the presence or absence of 3 mg/kg PNU for 3 h. Results are mean  $\pm$  S.D. ( $n = 6$ ). **(C)** q-PCR of miR-124 in spleen obtained from BALB/c mice injected via the tail vein every day with 100 nmol/kg miR-124 agomir or matched control for 3 days. Results are mean  $\pm$  S.D. ( $n = 6$ ). **(D)** Survival rate of BALB/c mice i.p. given 30 mg/kg LPS together with control vehicle or the indicated dose of nicotine (nicotine was i.p. injection again after 12 h).  $n = 16$ . **(E)** q-PCR of miR-124 in spleen of BALB/c mice injected via the tail vein every day with 12.5 mg/kg antisense miR-124 vivo-morpholino (MO) or matched control for 3 days. Results are mean  $\pm$  S.D. ( $n = 6$ ).  $**P < 0.01$  (Student's *t*-test in **A**, **B**, **C** and **E**, log-rank test in **D**).
