# Supplementary material for: MicroRNA-124 mediates the cholinergic anti-inflammatory action through inhibiting the production of pro-inflammatory cytokines
Source: PubMed Central journal article supplement — Cell Res. 2013 Aug 27;23(11):1270–83. doi: 10.1038/cr.2013.116 (PMC3817544; doi:10.1038/cr.2013.116), 2013-08-27
Supplement: cr2013116x4.pdf [file cr2013116x4.pdf]

## Supplementary information, Figure S4

**A**

|                      |                                  | predicted consequential pairing of target region (top) and miRNA (bottom) | seed match |
|----------------------|----------------------------------|---------------------------------------------------------------------------|------------|
| <b>Target site 1</b> | Position 823-830 of STAT3 3' UTR | 5' . . . CAGCCUGCCUGUGGGUGCCUUA . . .<br>                                 | 8mer       |
|                      | mmu-miR-124a                     | 3' . . . CCGUAAGUGGCG--CACGGAAU                                           |            |
| <b>Target site 2</b> | Position 823-830 of STAT3 3' UTR | 5' . . . CAGCCUGCCUGUGGGUGCCUUA . . .<br>                                 | 8mer       |
|                      | mmu-miR-124a.2                   | 3' . . . ACCGUAAGUGGCG--CACGGAAU                                          |            |

**B**

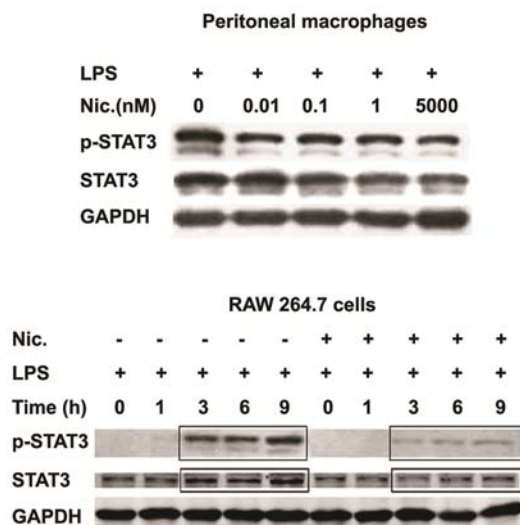

**C**

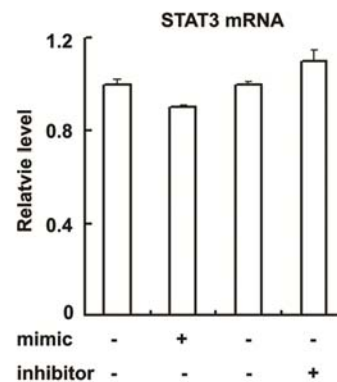

**D**

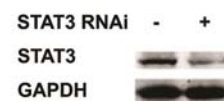

**E**

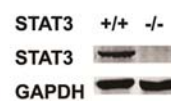

**Figure S4** miR-124 is predicted to target STAT3, and nicotine treatment reduces STAT3 and LPS-induced STAT3 phosphorylation. **(A)** The alignment of miR-124 and its target sites in 3'-UTR of STAT3 was from TargetScan (<http://www.targetscan.org>). **(B)** Upper panel: Western blotting of STAT3 and phosphorylated STAT3 at Y705 in peritoneal macrophages treated with 100 ng/ml LPS together with the indicated doses of nicotine for 9 h. Lower panel: Western blotting of STAT3 protein and phosphorylated STAT3 at Y705 in RAW264.7 cells stimulated with 100 ng/ml LPS in the presence or absence of nicotine (5 mM) for the indicated times. Results are representative of three independent experiments. **(C)** q-PCR detection of STAT3 mRNA in RAW264.7 cells transfected with miR-124 mimic or miR-124 inhibitor and

their corresponding controls for 36 h. Data represent mean  $\pm$  S.D. ( $n = 3$ ). **(D)** Representative western blotting of STAT3 protein in RAW264.7 macrophages transfected with control siRNA or STAT3 siRNA for 48 h ( $n = 3$ ). **(E)** Representative western blotting of STAT3 protein in STAT3<sup>+/+</sup> MEF from E13.5 mouse embryos or STAT3<sup>-/-</sup> MEF cell line ( $n = 3$ ).
