# Supplementary material for: MicroRNA-124 mediates the cholinergic anti-inflammatory action through inhibiting the production of pro-inflammatory cytokines
Source: PubMed Central journal article supplement — Cell Res. 2013 Aug 27;23(11):1270–83. doi: 10.1038/cr.2013.116 (PMC3817544; doi:10.1038/cr.2013.116), 2013-08-27
Supplement: cr2013116x5.pdf [file cr2013116x5.pdf]

## Supplementary information, Figure S5

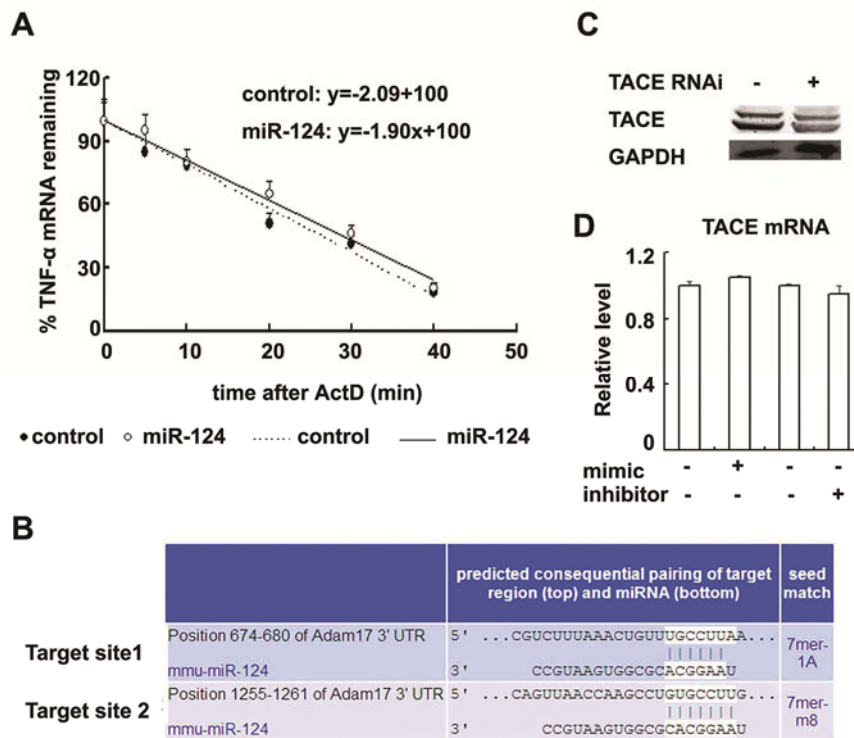

**Figure S5** miR-124 does not affect TNF- $\alpha$  mRNA stability and TACE mRNA level.

(A) RAW264.7 cells were transfected with miR-124 mimic or negative control for 36 h. Following treatment with 100 ng/ml LPS for 9 h, cells were incubated with actinomycin D (10  $\mu$ g/ml) for the indicated times. TNF- $\alpha$  mRNA was measured with q-PCR. TNF- $\alpha$ /GAPDH ratio at time 0 was considered as 100% expression and used to calculate the mRNA half-life at all other time points. Data represent mean  $\pm$  S.D. ( $n = 6$ ). (B) The sequence alignment of miR-124 and its potential target sites in 3'-UTR of TACE was from TargetScan (<http://www.targetscan.org>). (C) Representative western blotting of TACE protein in RAW264.7 macrophages transfected with TACE RNAi or control RNAi for 36 h ( $n = 3$ ). (D) q-PCR detection of TACE mRNA in RAW264.7 macrophages transfected with miR-124 mimic or miR-124 inhibitor and their corresponding controls for 36 h. Data represent mean  $\pm$  S.D. ( $n = 3$ ).
